# Supplementary material
Source: PubMed Central journal article supplement (PMC3753100)

# **The C2'-OH of Amphotericin B Plays an Important Role in Binding the Primary Sterol of Human But Not Yeast Cells**

Brandon C. Wilcock, Matthew M. Endo, Brice E. Uno, and Martin D. Burke\*  
*Howard Hughes Medical Institute, Roger Adams Laboratory, Department of Chemistry,  
University of Illinois at Urbana-Champaign, Urbana, IL 61801*

## **Supporting Information**

Part B

VIII. NMR Spectra of New Compounds

S29-S52

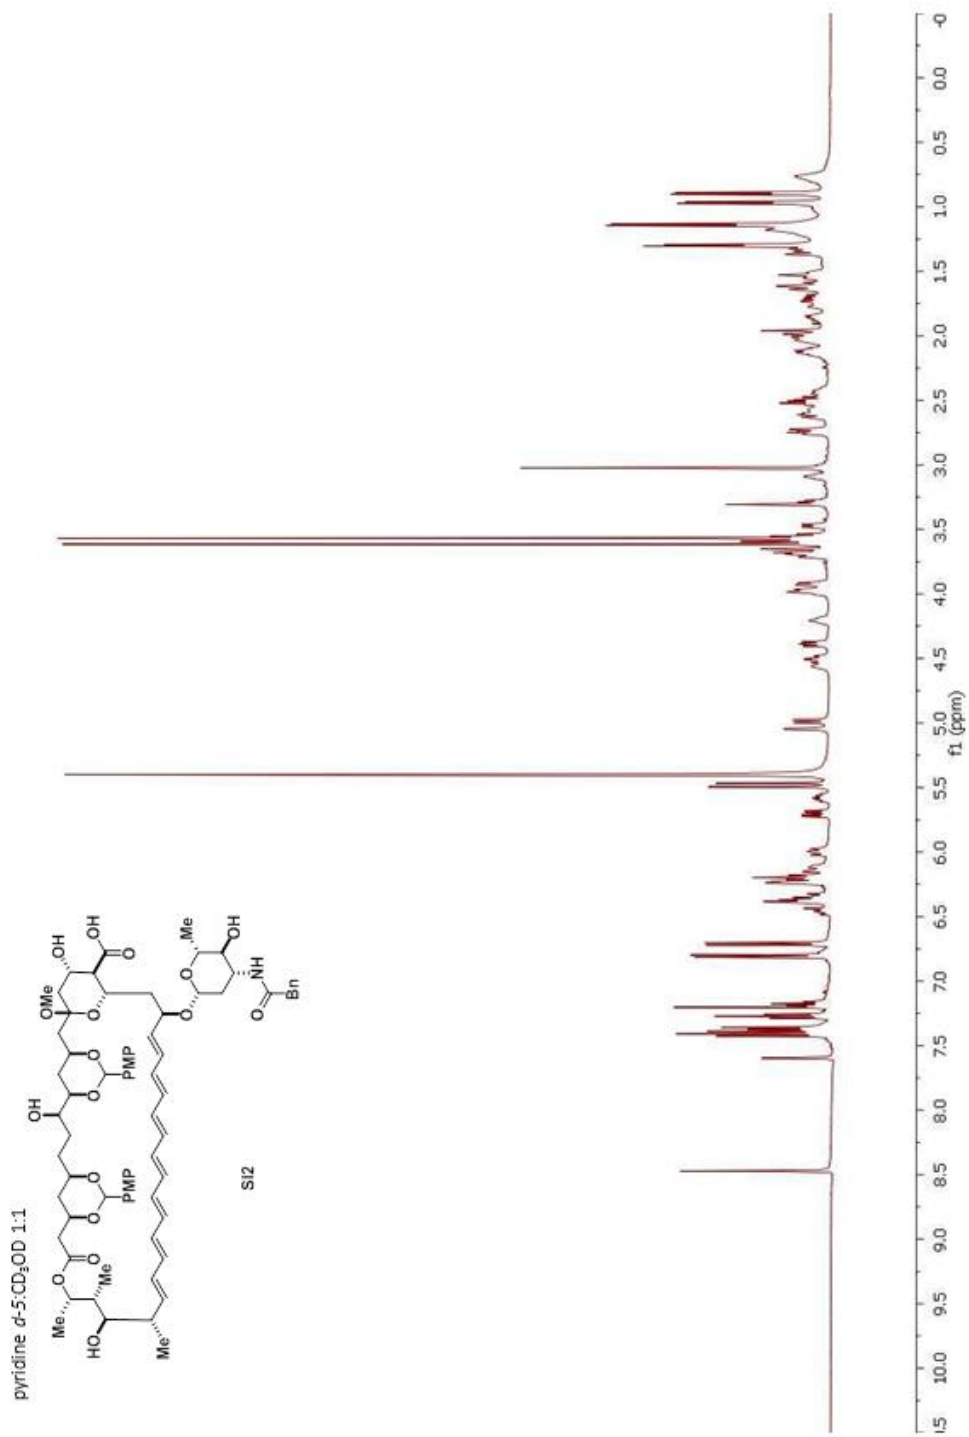

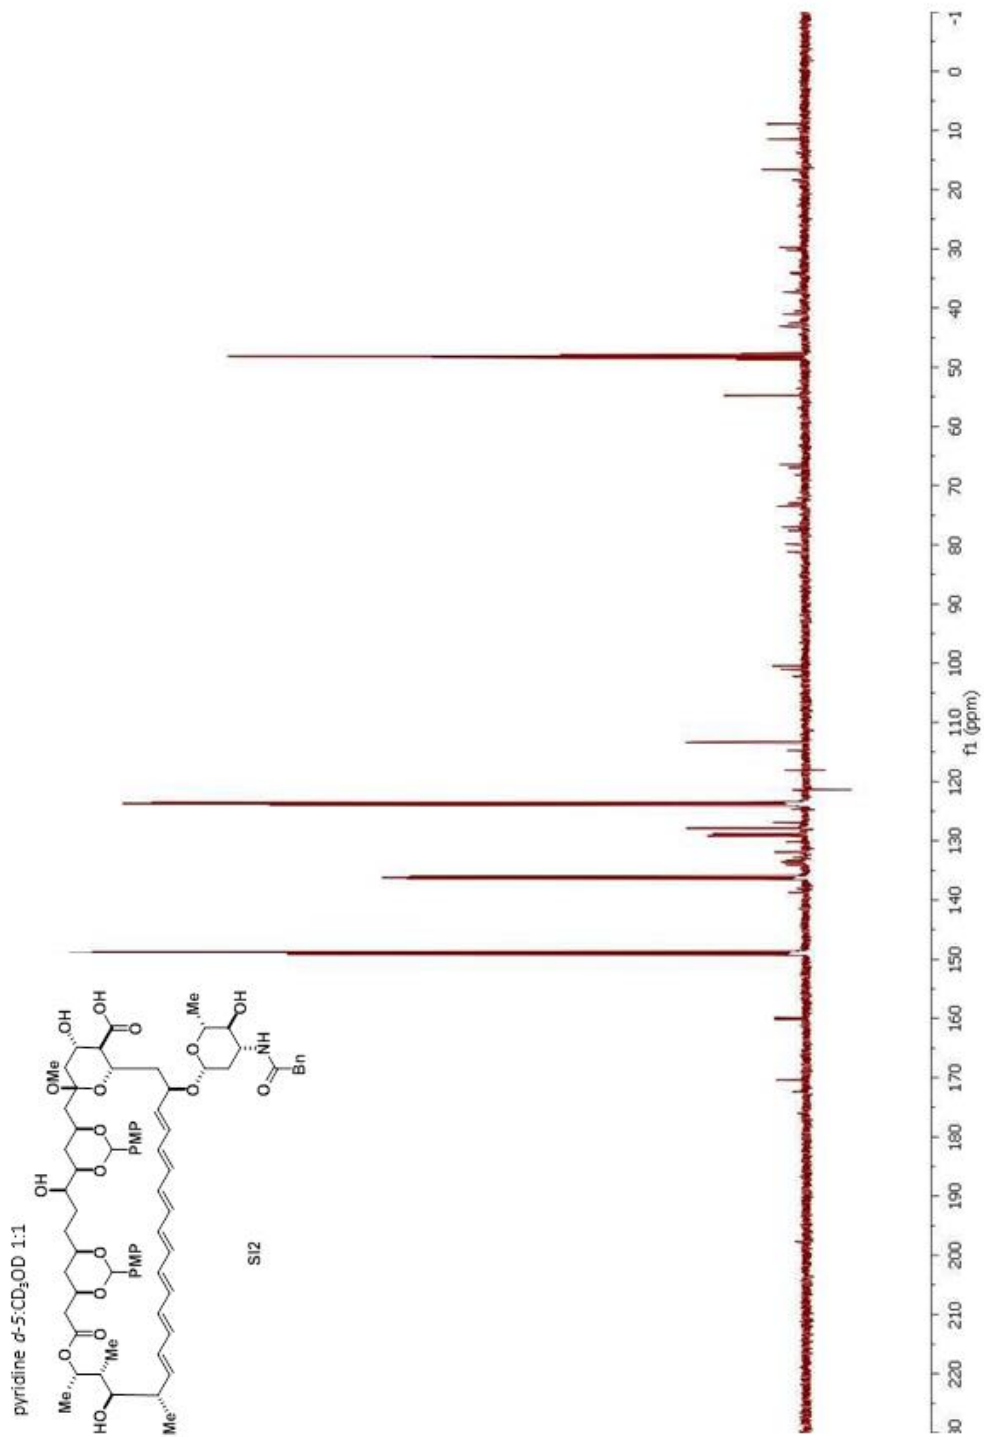

pyridine *d*-5-CD<sub>3</sub>OD 1:1

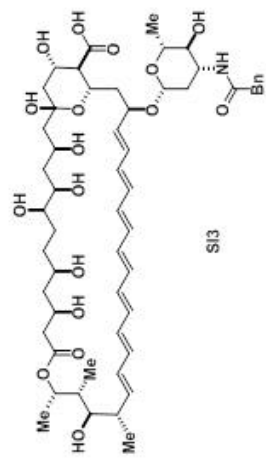

S13

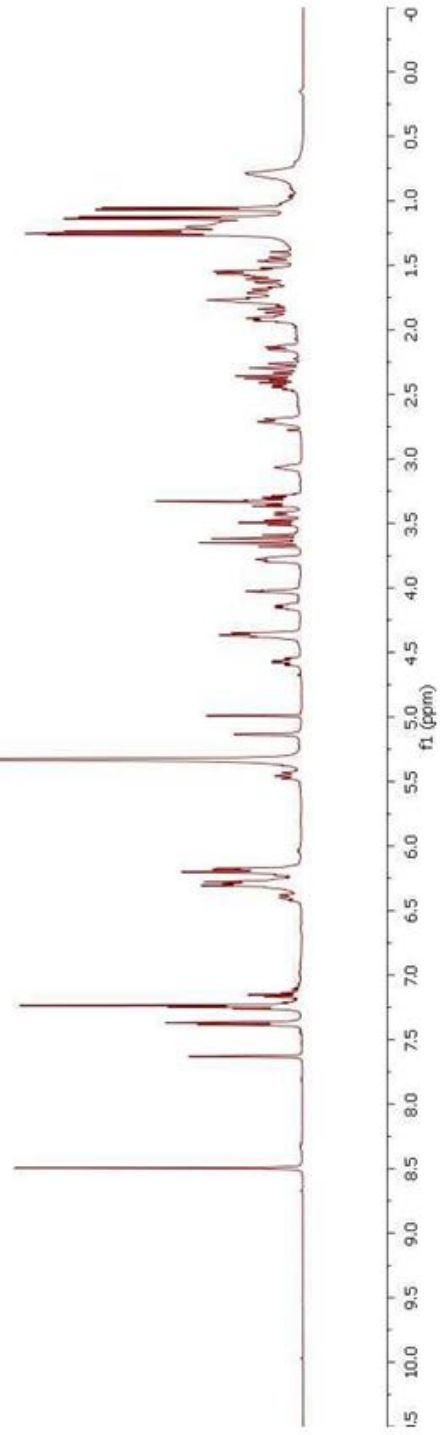

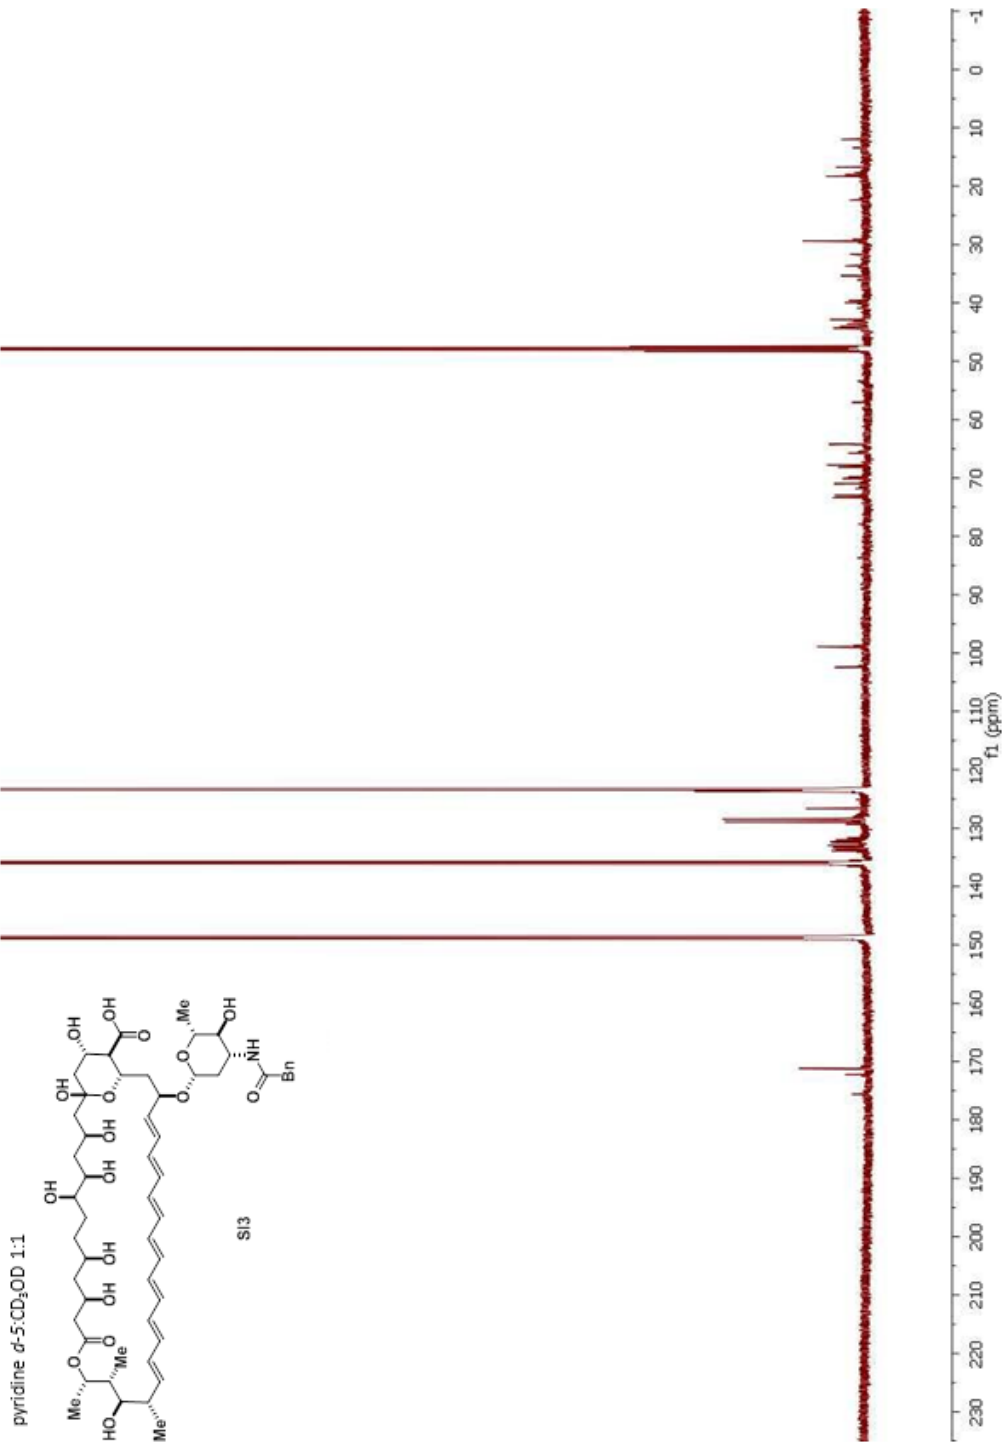

CDCl<sub>3</sub>

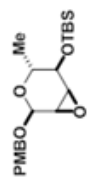

S17

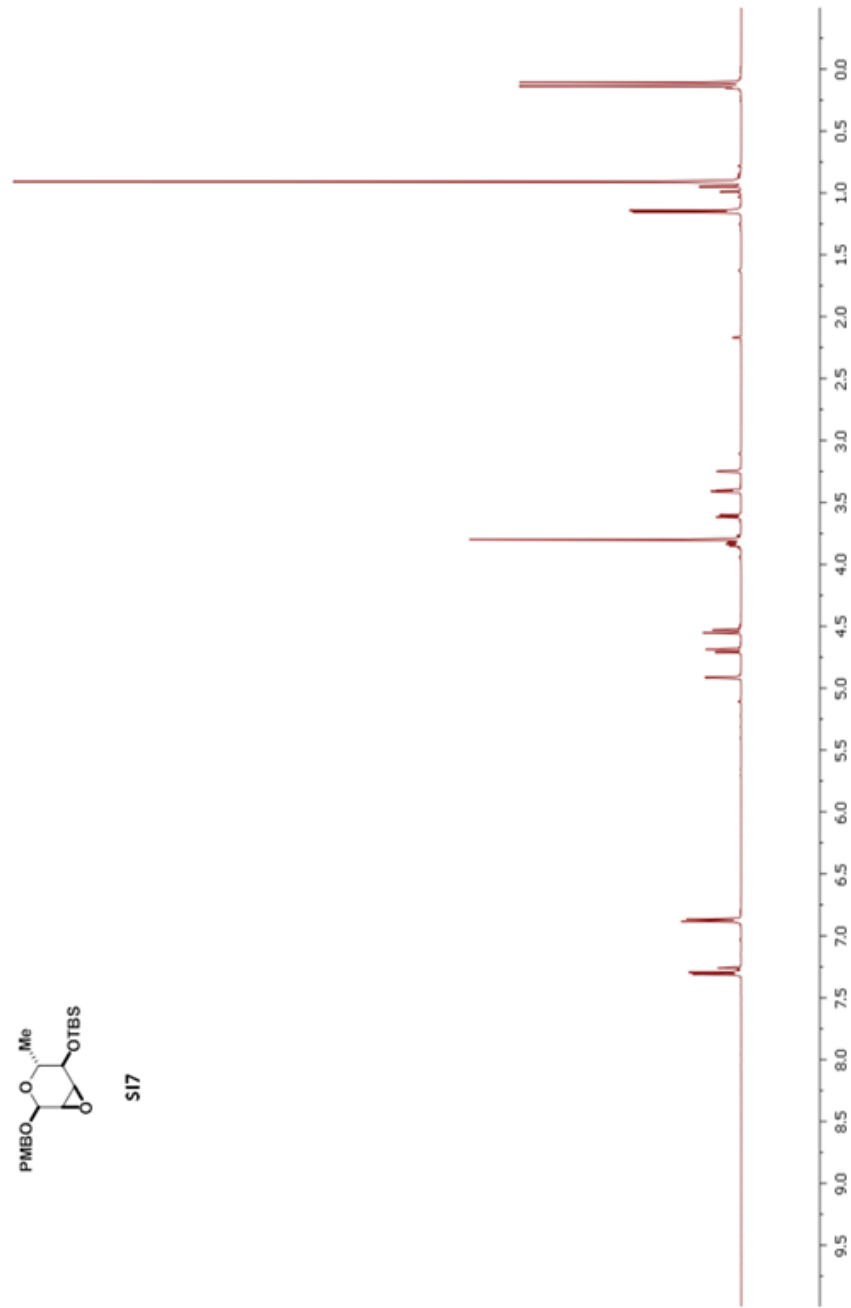

CDCl<sub>3</sub>

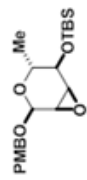

517

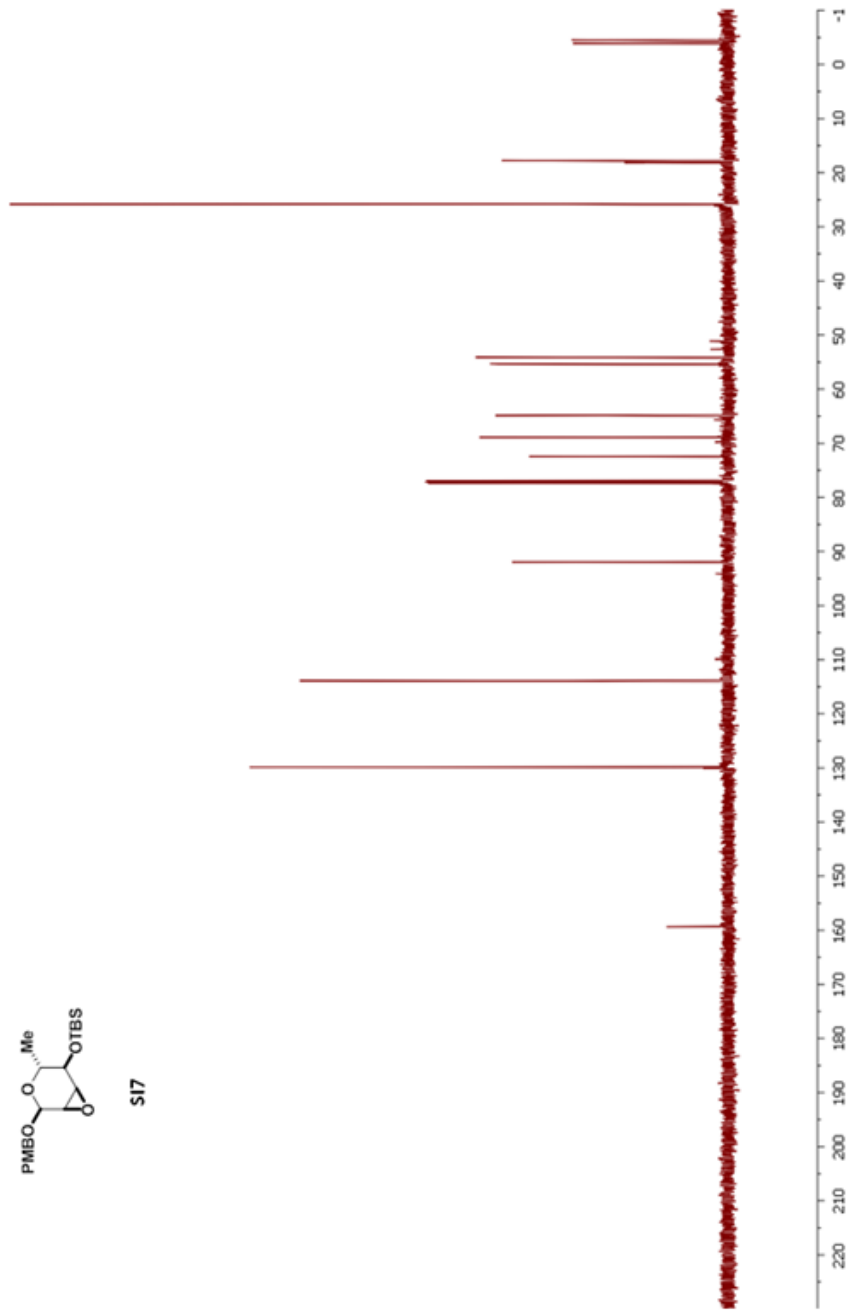

CDCl<sub>3</sub>

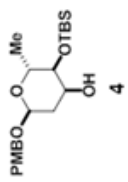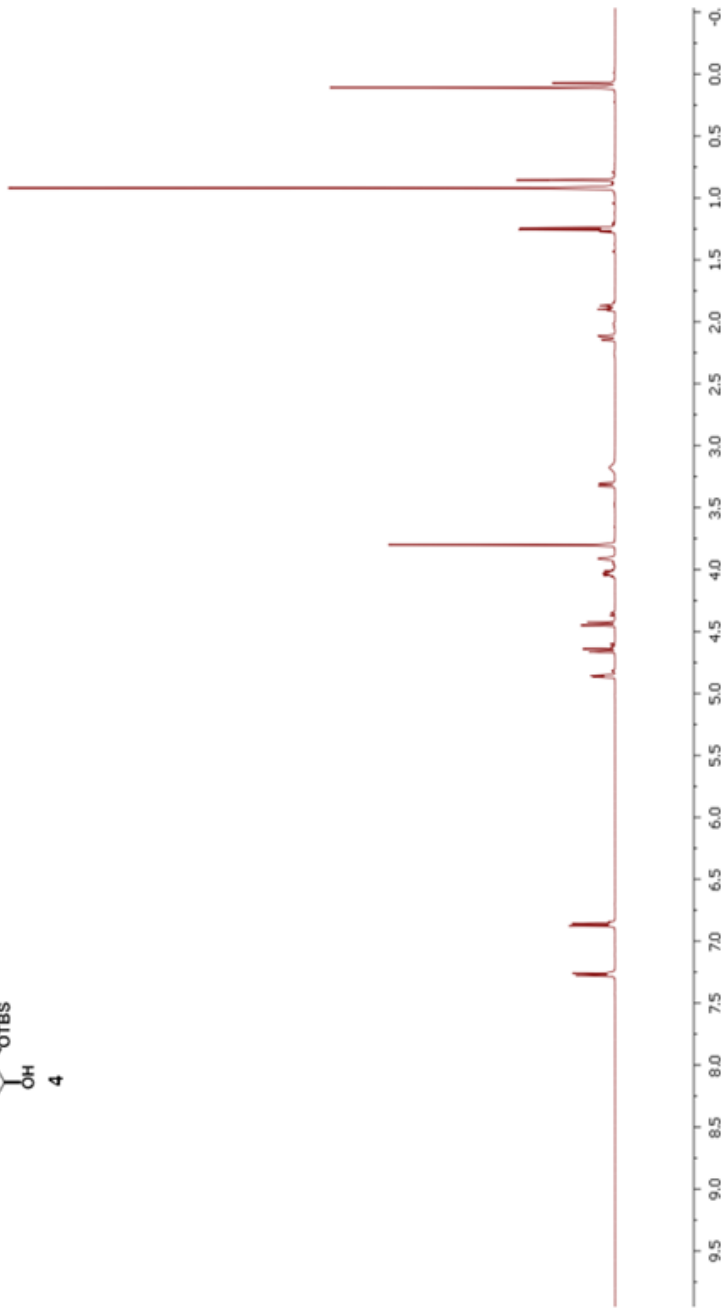



CDCl<sub>3</sub>

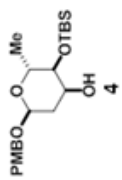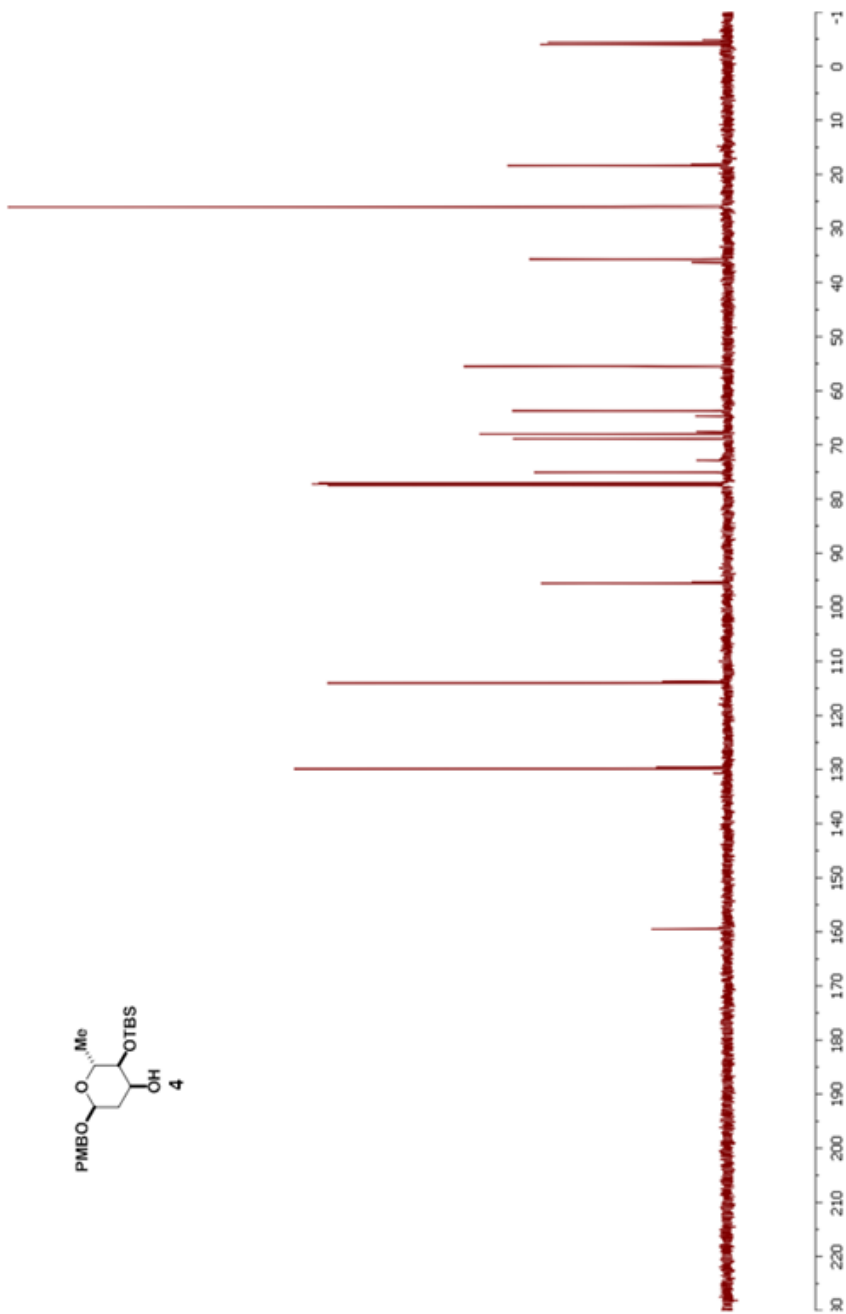

$\text{CDCl}_3$

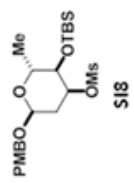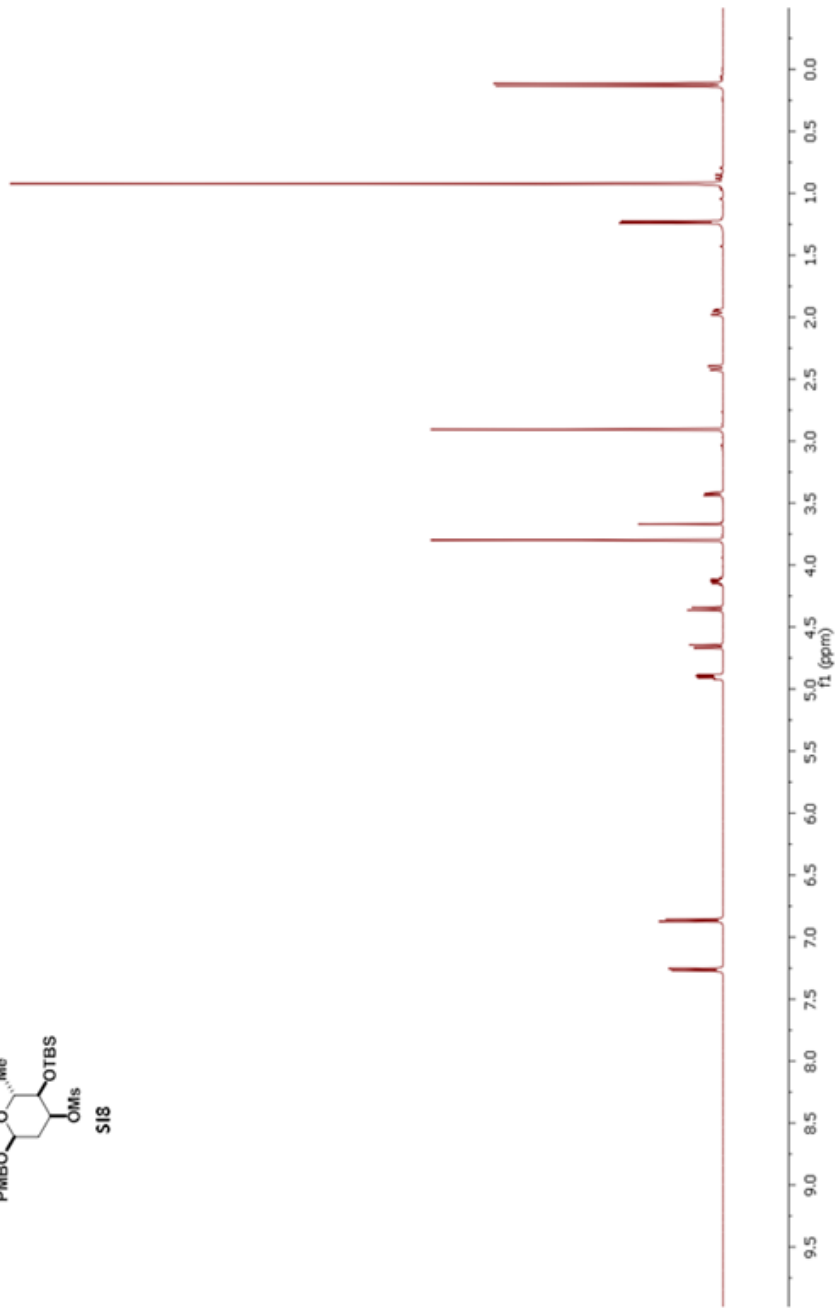

CDCl<sub>3</sub>

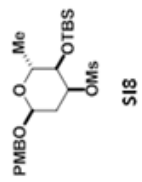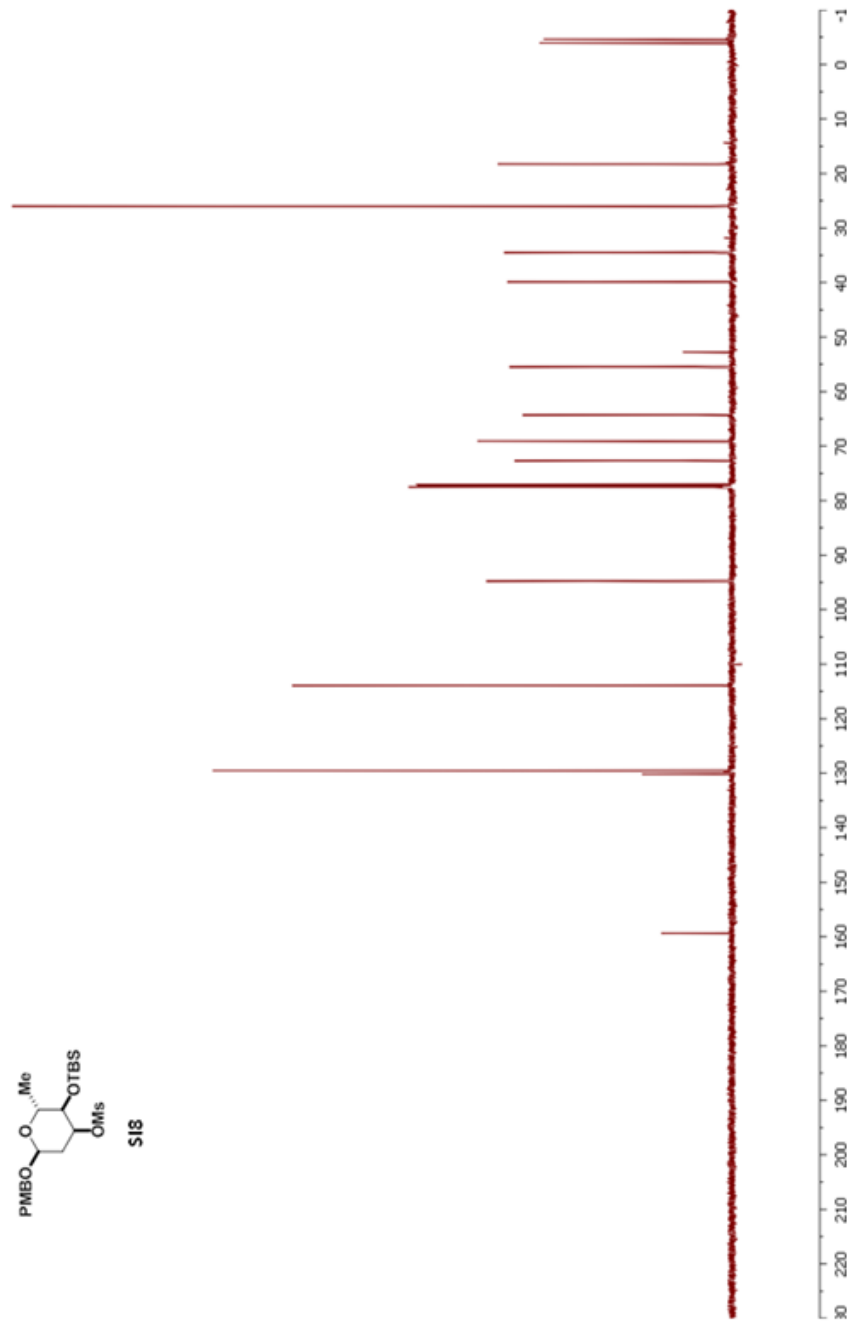

CDCl<sub>3</sub>

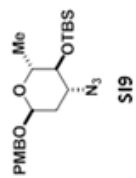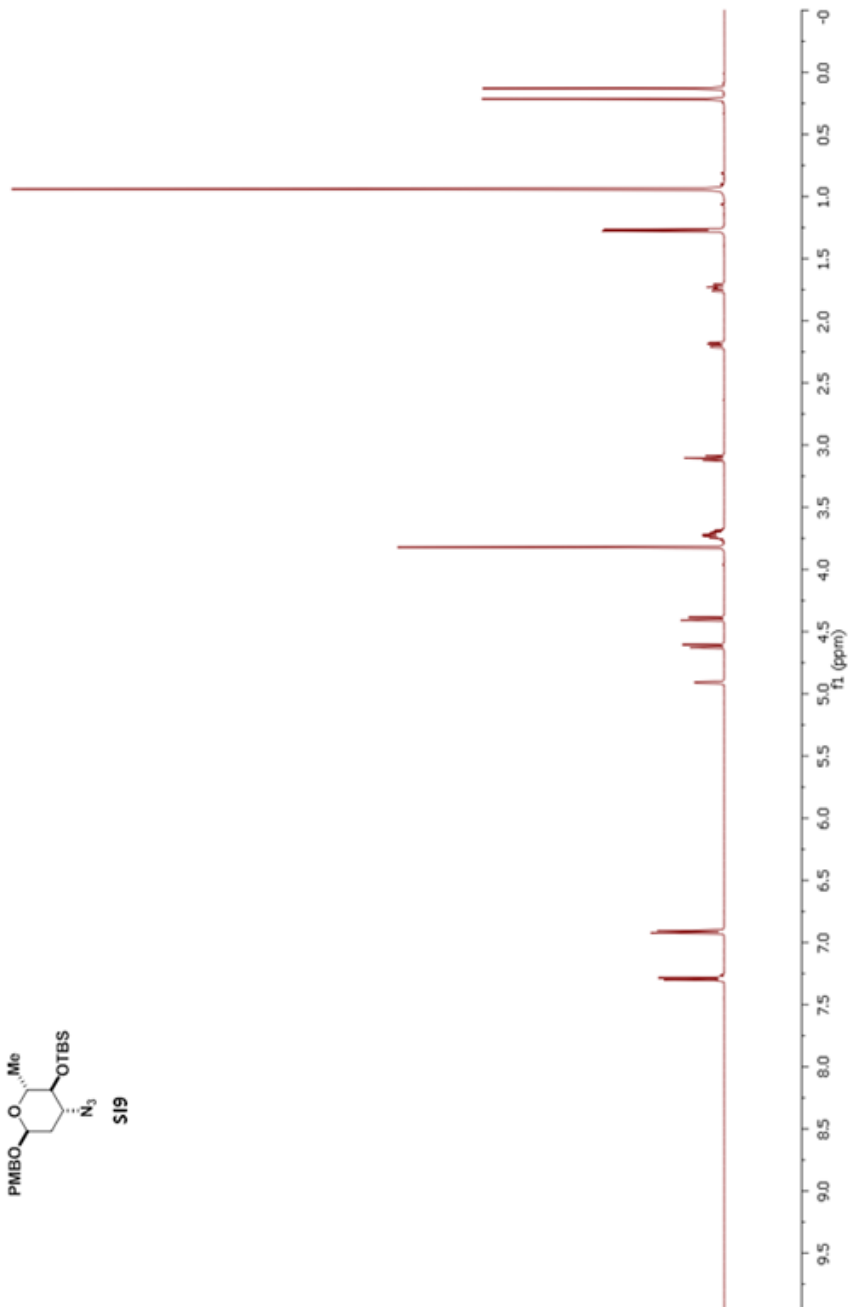

CDCl<sub>3</sub>

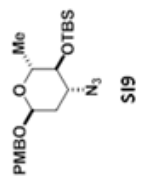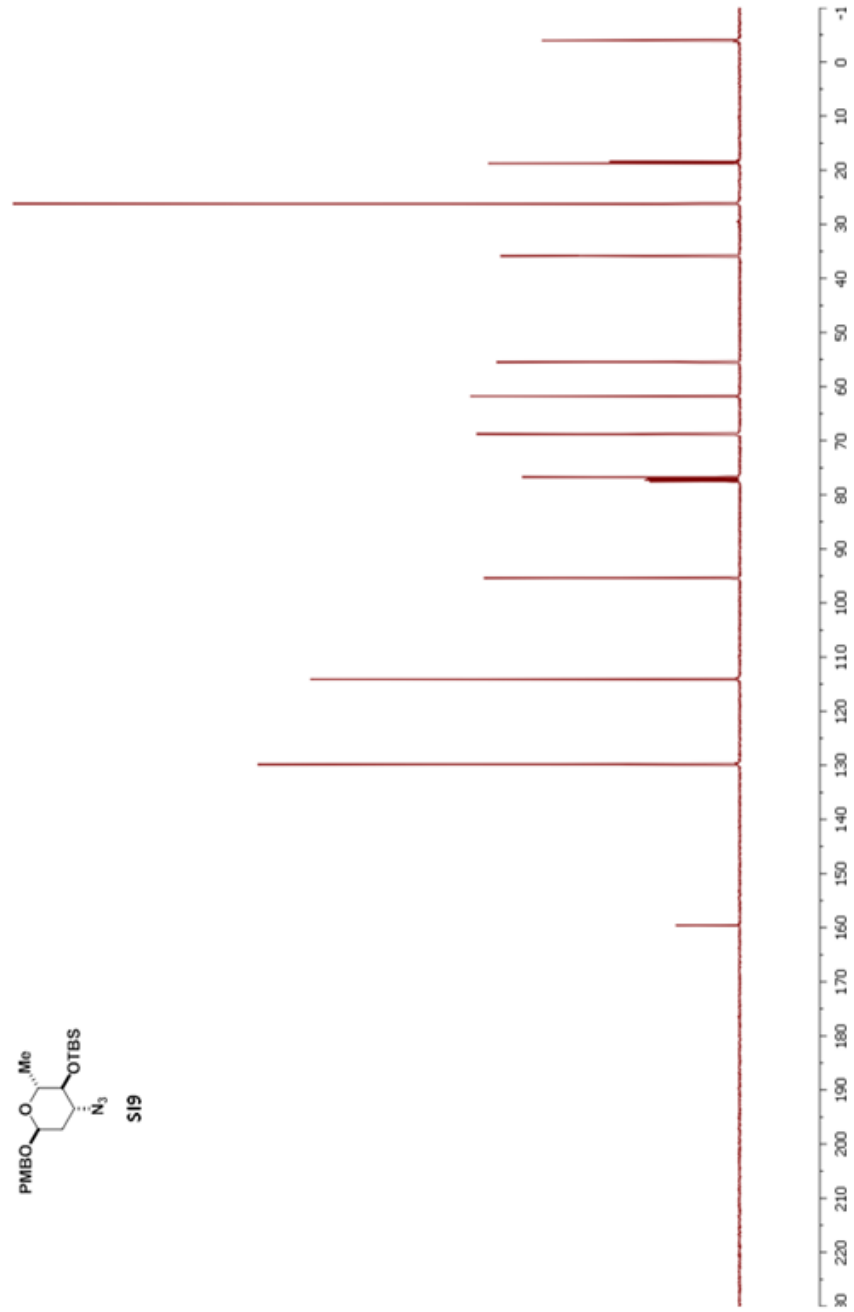

CD<sub>3</sub>C(O)CD<sub>3</sub>

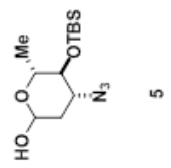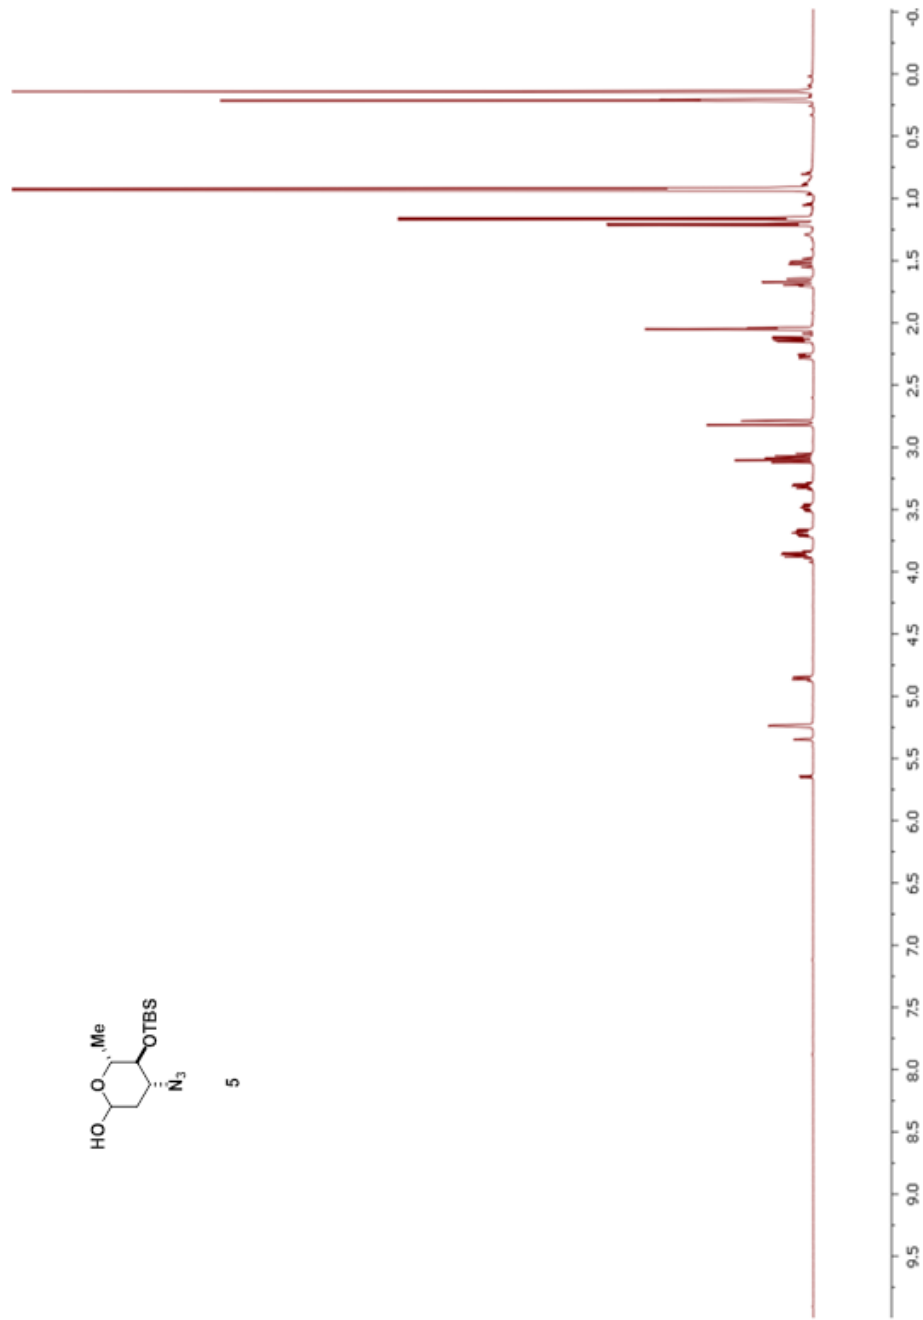

CD<sub>3</sub>C(O)CD<sub>3</sub>

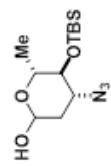

5

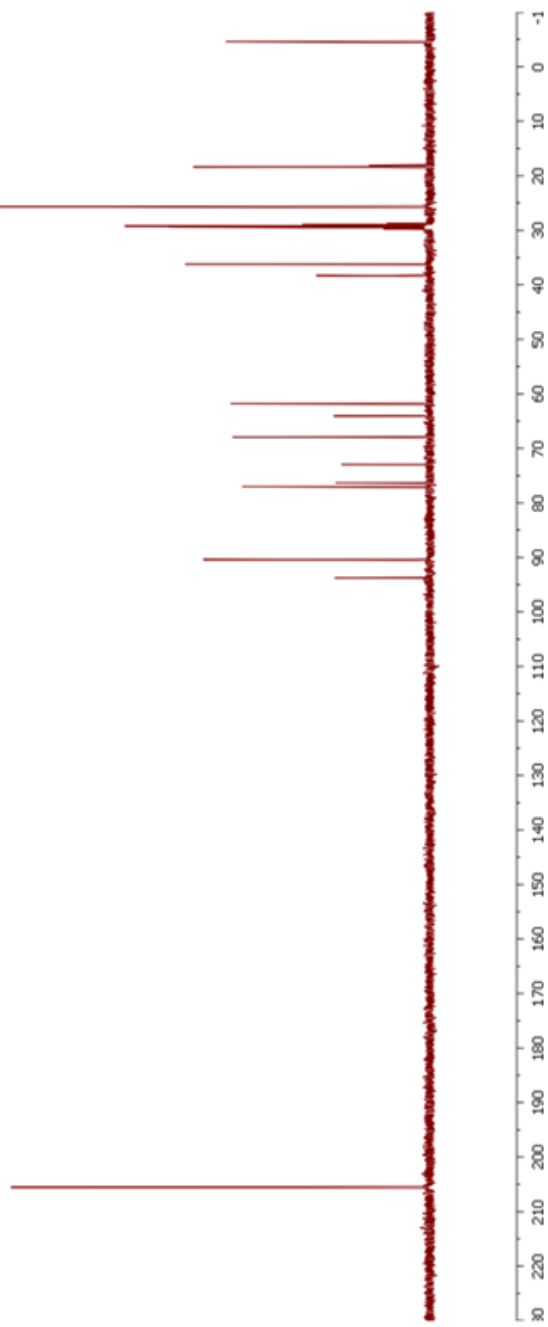

CD<sub>3</sub>C(O)CD<sub>3</sub>

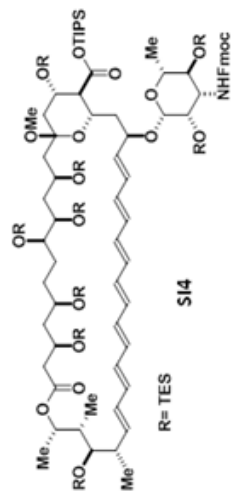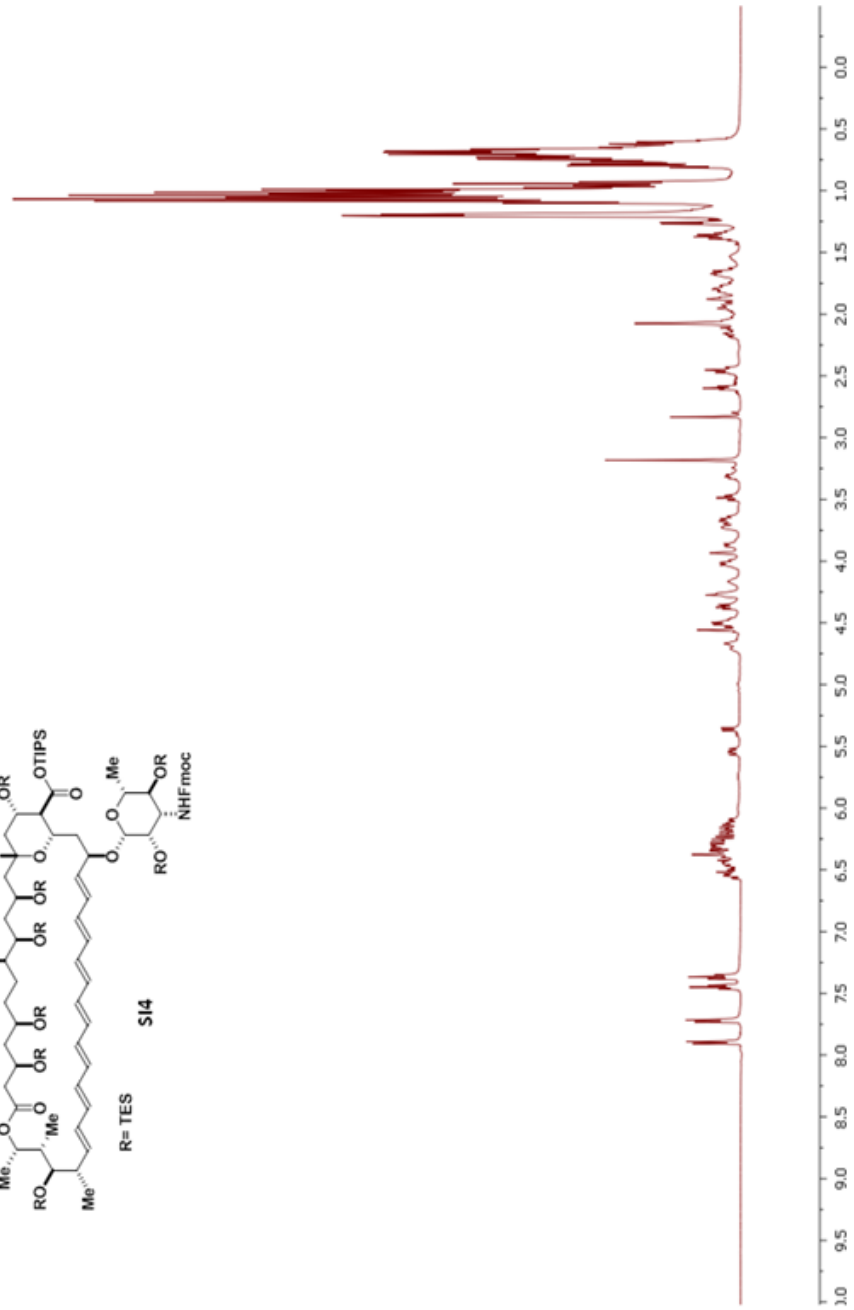



CD<sub>3</sub>C(O)CD<sub>3</sub>

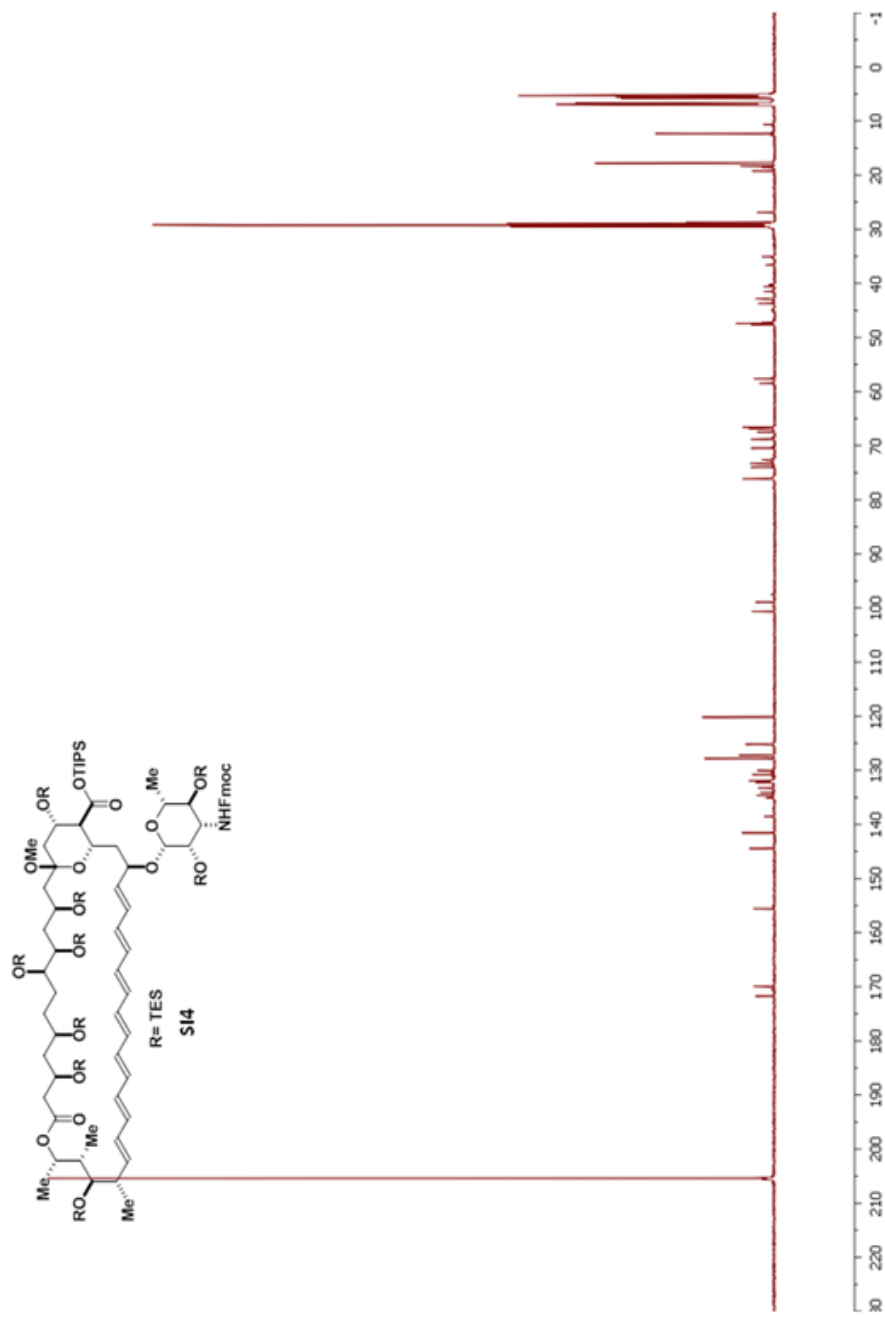

CD<sub>3</sub>C(O)CD<sub>3</sub>

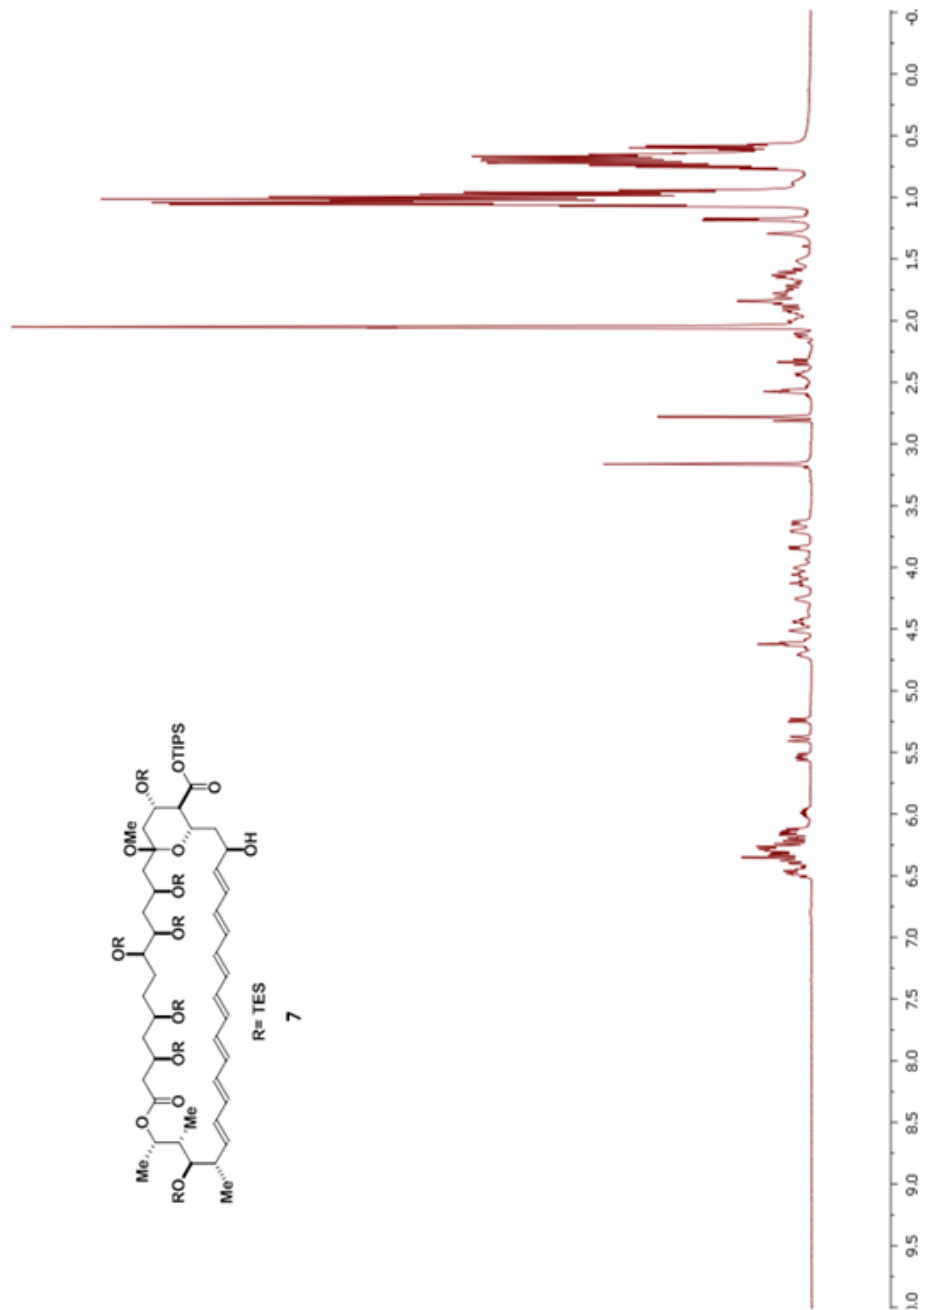

CD<sub>3</sub>C(O)CD<sub>3</sub>

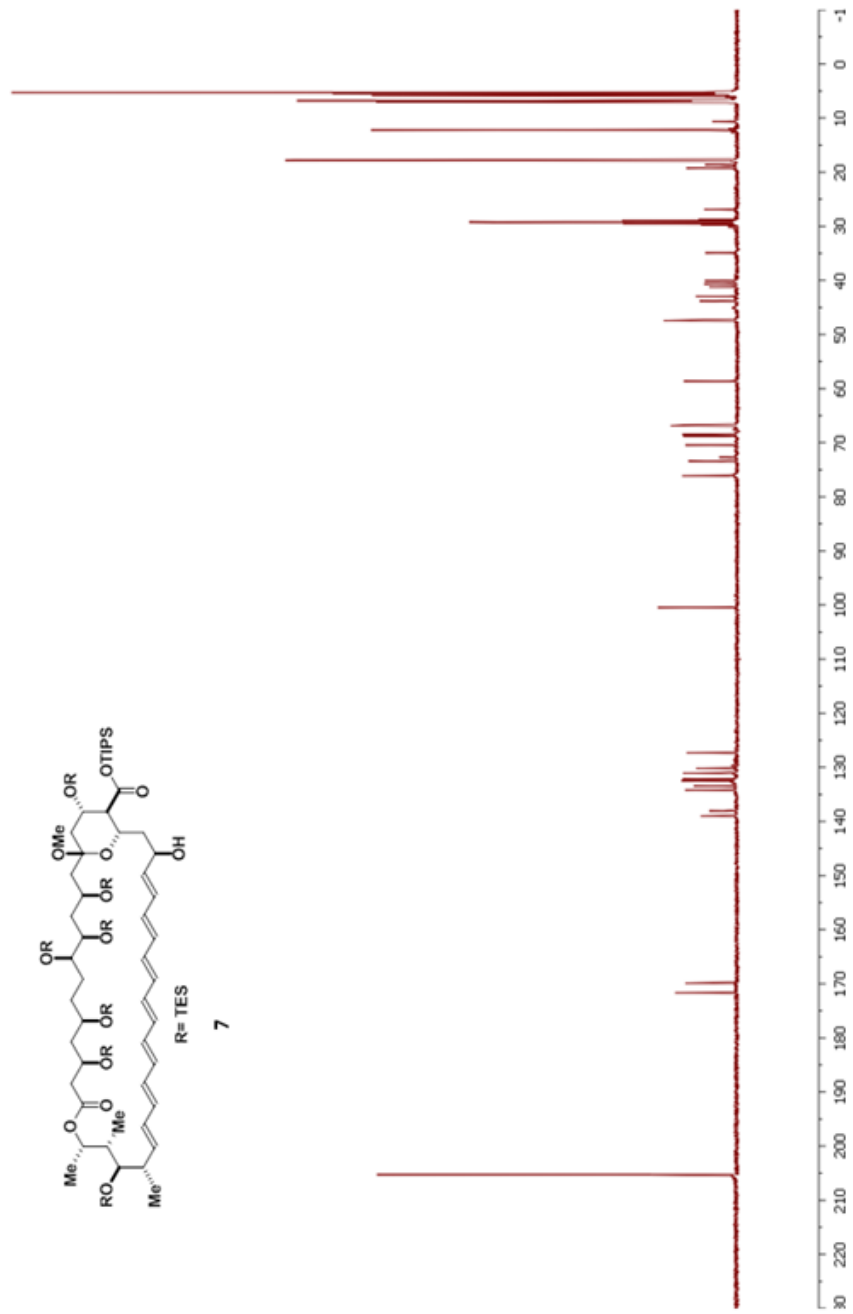

pyridine *d*-5:CD<sub>3</sub>OD 1:1

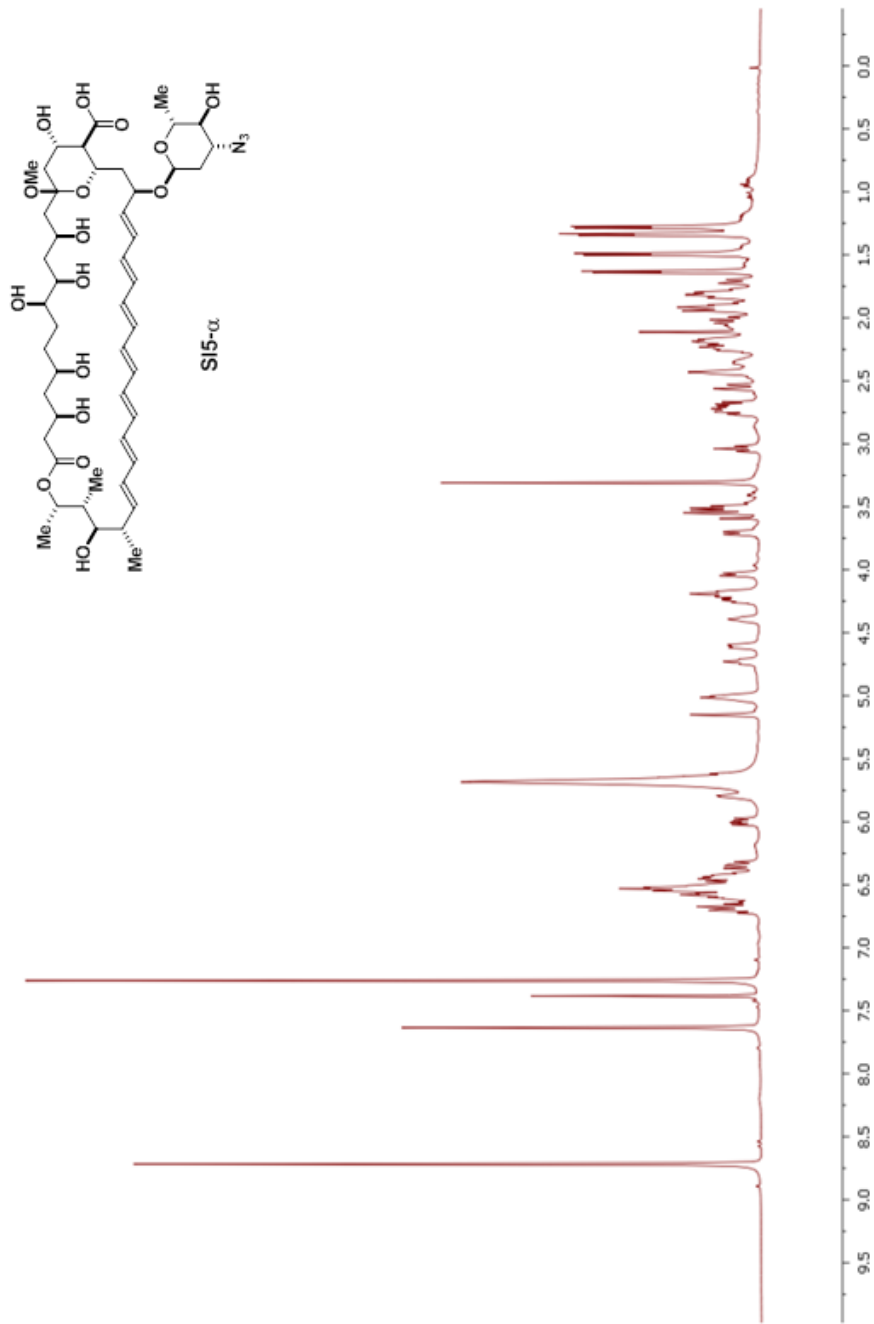



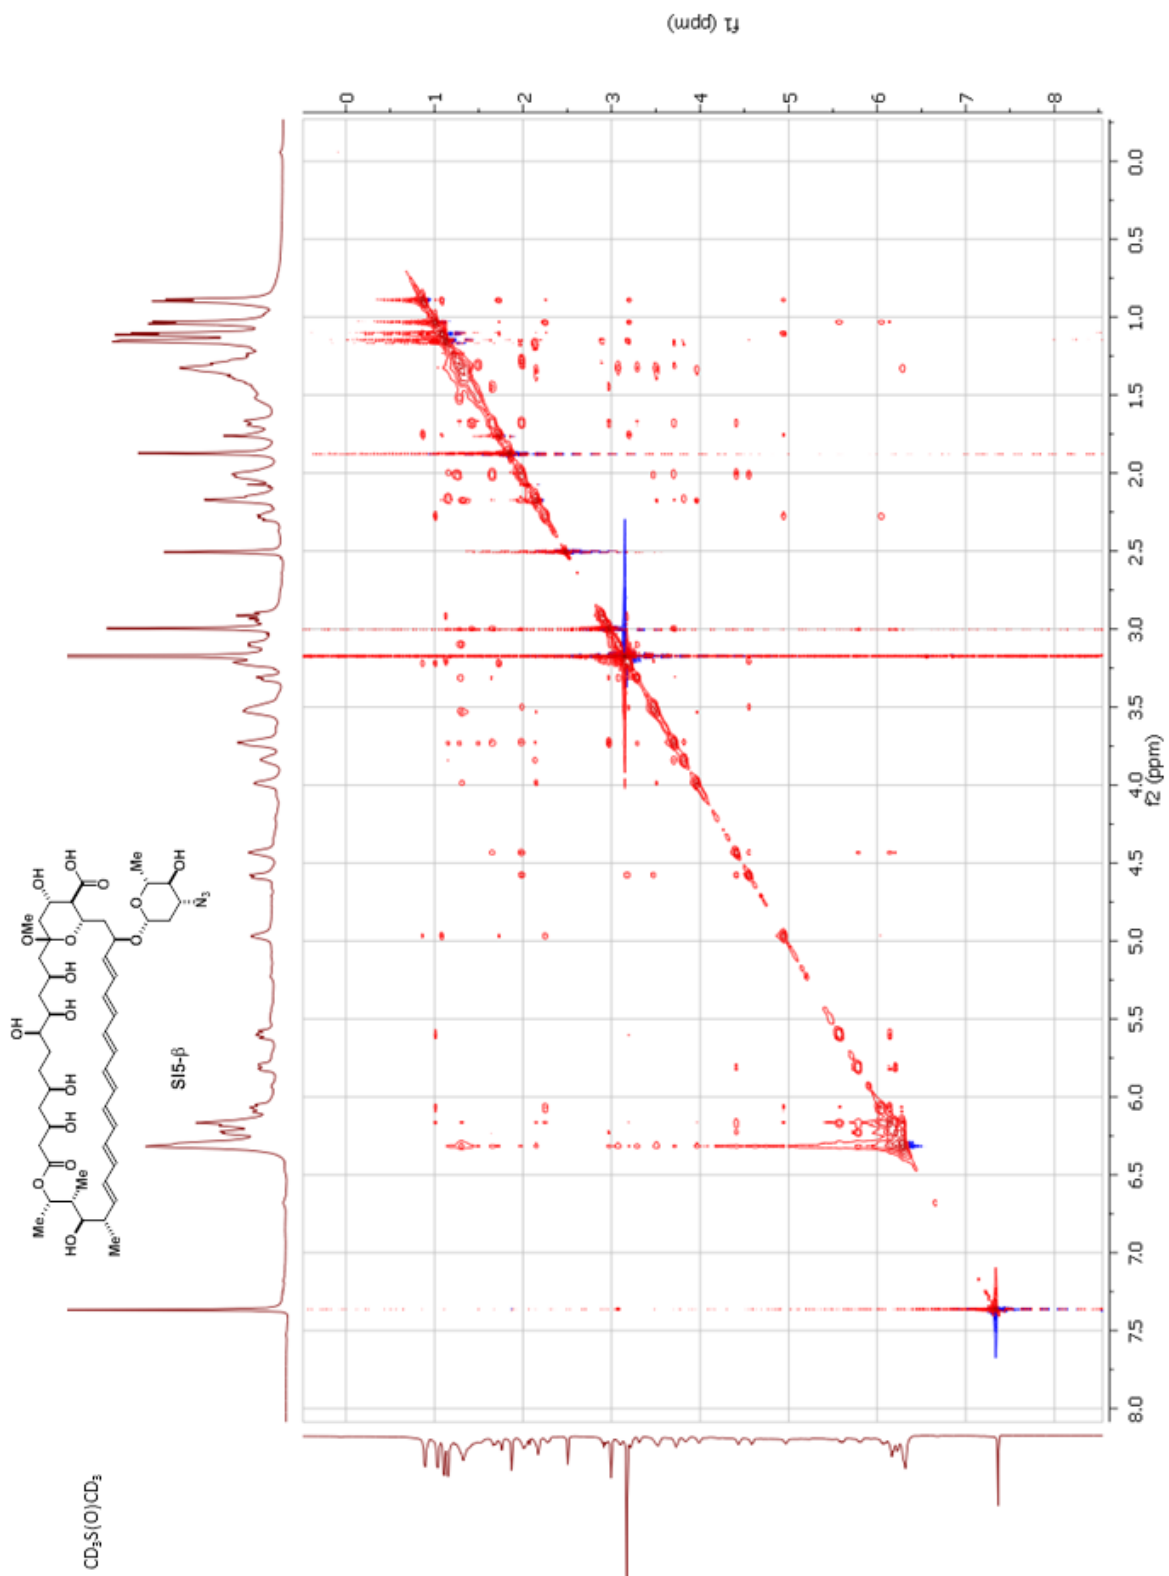

CD<sub>3</sub>S(O)CD<sub>3</sub>

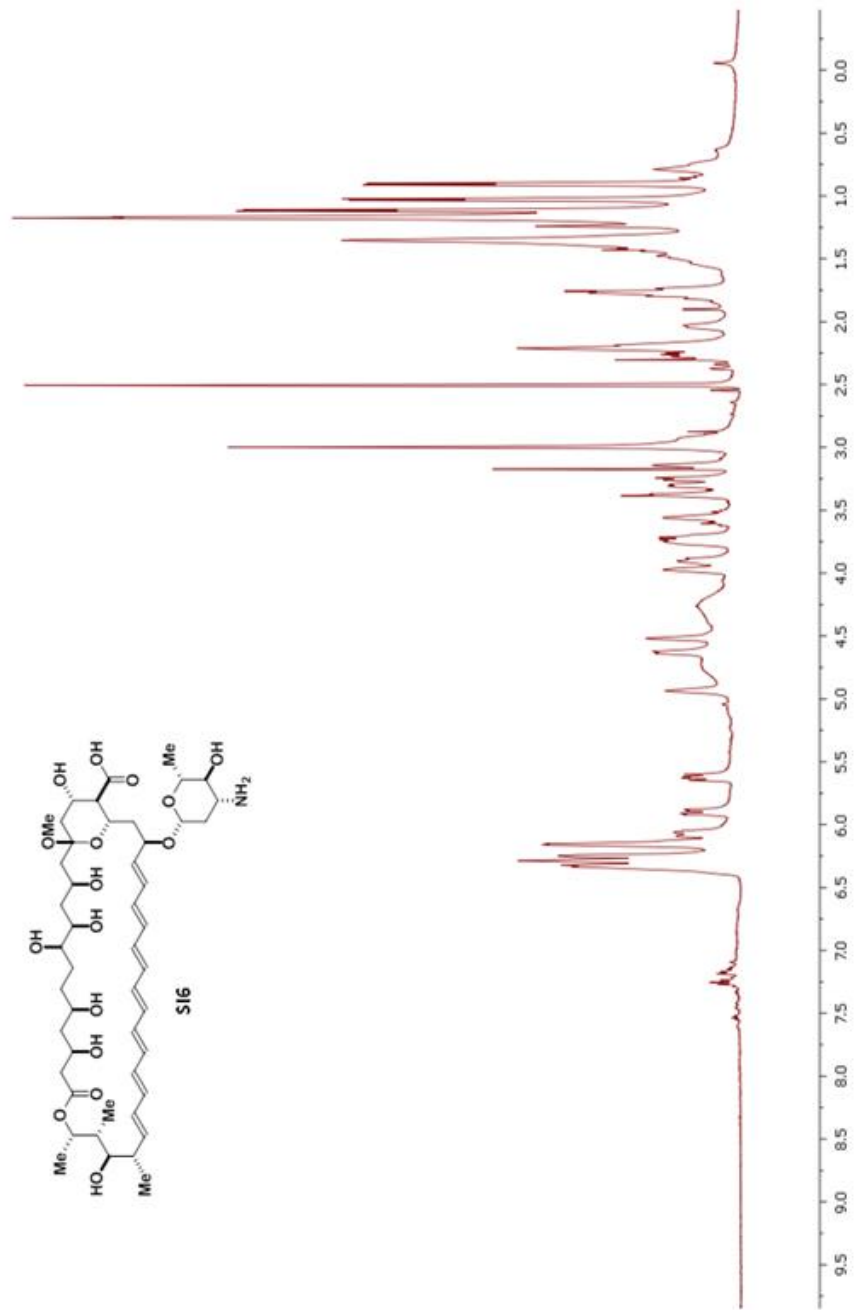

Supplement: NIHMS488444-supplement-1_si_002.pdf [file NIHMS488444-supplement-1_si_002.pdf]
